# Supplementary material
Source: MDPI journal article supplement (https://www.mdpi.com/2073-4352/6/4/35)

# Supplementary Materials: PRINCEPS: A Computer-Based Approach to the Structural Description and Recognition of Trends within Structural Databases, and its Application to the Ce-Ni-Si System

Yiming Guo and Daniel C. Fredrickson

## S1. PRINCEPS Modules

The current PRINCEPS package is composed of the following modules (Table S1).

Table S1. List of PRINCEPS modules.

| Module name             | Function                                                                                                                                                    |
|-------------------------|-------------------------------------------------------------------------------------------------------------------------------------------------------------|
| <i>Importcif</i>        | converts .cif files into .pos format for subsequent analysis                                                                                                |
| <i>Cluster</i>          | performs clustering analysis on a group of phases                                                                                                           |
| <i>Coordmatch</i>       | project sites in a target phase into a collection of reference phases, and provide assessment of decomposition quality; also generates site projection maps |
| <i>Terndist</i>         | generates ternary phase diagram connecting similar phases; also generates inter-phasic distance matrices                                                    |
| <i>Figuretool_coord</i> | auxiliary function for site projection map generation                                                                                                       |
| <i>Ternplot</i>         | auxiliary function for ternary phase diagram generation                                                                                                     |

All crystal structures used in this work were obtained in CIF format from the Inorganic Crystal Structure Database (ICSD). These CIF files are converted to .pos files using the *importcif* module in the PRINCEPS package, which is the format used for all subsequent analyses.

All CE match analyses are performed using the *coordmatch* module. The result of the analysis is printed in the MATLAB command window, and also saved as text files along with additional information about atomic CE of the phases involved in the analysis. When only one target phase is specified, *coordmatch* also generates the site projection map if the colors of reference phases are provided: this functionality utilizes the *figuretool\_coord* module in the package, in which the user can control the appearance (such as camera settings and lighting parameters) of the figure, as well as customized structural features (bonds, polyhedra, unit cells, etc.).

The clustering analyses of binary phases and of ternary phases are performed using the *cluster* module. It also outputs a .csv table containing distances between the phases to be analyzed.

The ternary phase diagram with connected phases is generated using the *terndist* module. It also outputs a .csv table containing distances between all target phases and all (both target and reference) phases. The distance table is presented in Section S4.

## S2. Algorithm Description for Match Quality Assessment and Projection Decomposition Weight Determination

### S2.1. Assessment of CE Match Quality

The CE match quality of a site in the target phase is determined by its best match in the reference phases. If the distance between the CEs of target and best match reference site is  $d$ , the quality of the site is given by

$$quality = \frac{1}{1 + \frac{d}{cr^2}}$$

In this expression,  $c = 0.5$  is an arbitrarily chosen factor, and  $r$  is the radius of the atom in the target phase: the reasoning behind dividing  $d$  by  $r^2$  is that larger atoms in general have more atoms in their CEs, and hence have larger magnitude of the descriptors. Since the surface area of the coordination sphere is approximately proportional to  $r^2$ , including this factor in the formula helps correct this systematic effect due to the size of the central atom to provide a more consistent match quality.

From the definition of match quality, it can be seen that a distance of zero results in a match quality of 100%, while a distance of infinity results in a match quality of 0%. Changing the value of  $c$  will change the criterion for quality assessment: a smaller  $c$  value corresponds to a stricter criterion, which scores a lower match quality for the same distance. However, this will not affect the relative order of decomposition qualities between sites, but only their absolute magnitudes. In other words, the choice of  $c$  only sets the standard for what we would like to call a “good quality decomposition” for intuitive interpretation of the analysis result.

The overall decomposition quality of the target phase is then calculated as the average of CE match quality of each site, weighted by their multiplicities.

### S2.2. Calculation of Decomposition Weight

The decomposition weights of a target phase onto reference phases are calculated in a site-wise fashion. In the following discussion, the target phase to be decomposed, and the collection of reference phases are denoted as  $P$  and  $\mathcal{R}$ , respectively.

For each site  $p$  in the target phase  $P$  and each site  $q$  in a reference phase  $Q \in \mathcal{R}$ , the weighting factor between these two sites is calculated as

$$w(p, q) = e^{-\frac{d(p, q)}{kr^2}}$$

where  $d(p, q)$  is the distance between these two sites.  $k = 0.05$  is an arbitrarily chosen factor, and  $r$  is the radius of the atom in the target phase: similar to the calculation of match quality, a factor of  $r^2$  is used to correct the size effect of the central atom. From this expression, it is clear that a shorter distance corresponds to a higher weight: when  $d(p, q) = 0$  we have  $w(p, q) = 1$ . The  $k$  factor controls the differentiation between difference sites: a smaller  $k$  value will result in larger difference in weighting factor for the reference sites, so a heavier weight will be assigned to the best matching phase, but the relative order of weights between phases is still preserved, i.e. it will not change which reference phase gets the highest weight. Similar to the choice of the  $c$  factor, these factors do not change the results of the core algorithm, but only in how the results are represented. As long as they are kept at a constant value throughout the analysis, any arbitrarily set value should lead to the same conclusions.

The weighting factor of a reference phase on the target site  $p$  is then defined as the maximal weighting factor among all sites in this reference phase, and normalized so that the weights on all reference phases add up to 1:

$$w(p, Q) = \frac{\max_{q \in Q} w(p, q)}{\sum_{Q \in \mathcal{R}} \max_{q \in Q} w(p, q)}$$

These site-wise decomposition weights are then averaged to give the overall decomposition weights, where the average is weighted by three factors: multiplicities, match qualities, and the user-defined weights of the elements.

### S3. PRINCEPS Output for All Ce-Ni-Si Ternary Phases

The following result is directly copied from the output of PRINCEPS analysis.

```

--- Analysis of phase Ce14Ni6Si11 ---
site Ce1 (10.00,2.00,5.00): quality = 87.38%
  1: site Ce1 in phase CeSi (10.00,0.00,7.00): distance = 2.3764
  2: site Ce1 in phase CeSi2 (8.00,0.00,12.00): distance = 5.6093
  3: site Si1 in phase CeNi2Si2 (5.00,4.00,1.00): distance = 6.3912
site Ce2 (10.00,2.00,5.00): quality = 82.26%
```

1: site Ce1 in phase CeSi (10.00,0.00,7.00): distance = 2.7162  
2: site Ce1 in phase CeSi2 (8.00,0.00,12.00): distance = 5.4652  
3: site Si1 in phase CeNi2Si2 (5.00,4.00,1.00): distance = 6.5722  
site Ce3 (9.00,2.00,6.00): quality = 75.71%  
1: site Ce1 in phase CeSi (10.00,0.00,7.00): distance = 3.1009  
2: site Ce1 in phase CeSi2 (8.00,0.00,12.00): distance = 5.7717  
3: site Si1 in phase CeNi2Si2 (5.00,4.00,1.00): distance = 6.2449  
site Ce4 (10.00,2.00,5.00): quality = 89.16%  
1: site Ce1 in phase CeSi (10.00,0.00,7.00): distance = 2.2437  
2: site Ce1 in phase CeSi2 (8.00,0.00,12.00): distance = 5.6821  
3: site Si1 in phase CeNi2Si2 (5.00,4.00,1.00): distance = 6.2992  
site Ce5 (10.00,2.00,5.00): quality = 87.84%  
1: site Ce1 in phase CeSi (10.00,0.00,7.00): distance = 2.3434  
2: site Ce1 in phase CeSi2 (8.00,0.00,12.00): distance = 5.6477  
3: site Si1 in phase CeNi2Si2 (5.00,4.00,1.00): distance = 6.3119  
site Ce6 (11.00,1.00,5.00): quality = 82.61%  
1: site Ce1 in phase CeSi (10.00,0.00,7.00): distance = 2.6946  
2: site Ce1 in phase CeSi2 (8.00,0.00,12.00): distance = 5.0807  
3: site Ce1 in phase CeNiSi# (8.00,4.80,7.20): distance = 6.5469  
site Ce7 (9.00,2.00,6.00): quality = 62.72%  
1: site Ce1 in phase CeSi (10.00,0.00,7.00): distance = 3.8088  
2: site Ce1 in phase CeSi2 (8.00,0.00,12.00): distance = 5.5916  
3: site Ce1 in phase CeNiSi# (8.00,4.80,7.20): distance = 5.6954  
site Ce8 (8.00,6.00,6.00): quality = 93.58%  
1: site Ce1 in phase CeNiSi# (8.00,4.80,7.20): distance = 1.8547  
2: site Ce1 in phase CeSi2 (8.00,0.00,12.00): distance = 3.7543  
3: site Ce1 in phase CeNi2Si2 (4.00,8.00,10.00): distance = 5.6059  
site Ce9 (10.00,2.00,5.00): quality = 87.52%  
1: site Ce1 in phase CeSi (10.00,0.00,7.00): distance = 2.3667  
2: site Ce1 in phase CeSi2 (8.00,0.00,12.00): distance = 5.6100  
3: site Si1 in phase CeNi2Si2 (5.00,4.00,1.00): distance = 6.3939  
site Ce10 (10.00,2.00,5.00): quality = 88.87%  
1: site Ce1 in phase CeSi (10.00,0.00,7.00): distance = 2.2659  
2: site Ce1 in phase CeSi2 (8.00,0.00,12.00): distance = 5.6749  
3: site Si1 in phase CeNi2Si2 (5.00,4.00,1.00): distance = 6.2964  
site Ce11 (11.00,1.00,5.00): quality = 80.83%  
1: site Ce1 in phase CeSi (10.00,0.00,7.00): distance = 2.8040  
2: site Ce1 in phase CeSi2 (8.00,0.00,12.00): distance = 5.2775  
3: site Si1 in phase CeNi2Si2 (5.00,4.00,1.00): distance = 6.3386  
site Ce12 (10.00,2.00,5.00): quality = 81.87%  
1: site Ce1 in phase CeSi (10.00,0.00,7.00): distance = 2.7407  
2: site Ce1 in phase CeSi2 (8.00,0.00,12.00): distance = 5.3968  
3: site Si1 in phase CeNi2Si2 (5.00,4.00,1.00): distance = 6.3898  
site Ce13 (8.00,6.00,6.00): quality = 89.40%  
1: site Ce1 in phase CeSi2 (8.00,0.00,12.00): distance = 2.2254  
2: site Ce1 in phase CeNiSi# (8.00,4.80,7.20): distance = 3.6050  
3: site Ce1 in phase CeSi (10.00,0.00,7.00): distance = 5.5336  
site Ce14 (8.00,4.00,8.00): quality = 96.27%  
1: site Ce1 in phase CeNiSi# (8.00,4.80,7.20): distance = 1.5322  
2: site Ce1 in phase CeSi2 (8.00,0.00,12.00): distance = 3.5797  
3: site Ce1 in phase CeNi2Si2 (4.00,8.00,10.00): distance = 5.4294  
site Ce15 (8.00,4.00,8.00): quality = 96.19%  
1: site Ce1 in phase CeNiSi# (8.00,4.80,7.20): distance = 1.5447  
2: site Ce1 in phase CeSi2 (8.00,0.00,12.00): distance = 3.5746  
3: site Ce1 in phase CeNi2Si2 (4.00,8.00,10.00): distance = 5.4386  
site Ni1 (6.00,0.00,3.00): quality = 95.07%  
1: site Si1 in phase CeSi2 (6.00,0.00,3.00): distance = 0.7839  
2: site Mx1 in phase CeNiSi# (6.00,1.20,1.80): distance = 0.8749  
3: site Si1 in phase CeSi (7.00,0.00,2.00): distance = 2.8443

site Ni2 (6.00,0.00,3.00): quality = 82.67%

- 1: site Si1 in phase CeSi2 (6.00,0.00,3.00): distance = 1.2491
- 2: site Mx1 in phase CeNiSi# (6.00,1.20,1.80): distance = 1.3059
- 3: site Si1 in phase CeSi (7.00,0.00,2.00): distance = 2.7250

site Ni3 (6.00,0.00,3.00): quality = 84.50%

- 1: site Si1 in phase CeSi2 (6.00,0.00,3.00): distance = 1.1947
- 2: site Mx1 in phase CeNiSi# (6.00,1.20,1.80): distance = 1.2391
- 3: site Si1 in phase CeSi (7.00,0.00,2.00): distance = 2.7682

site Ni4 (6.00,0.00,3.00): quality = 83.24%

- 1: site Si1 in phase CeSi2 (6.00,0.00,3.00): distance = 1.2325
- 2: site Mx1 in phase CeNiSi# (6.00,1.20,1.80): distance = 1.4488
- 3: site Si1 in phase CeSi (7.00,0.00,2.00): distance = 2.6823

site Ni5 (6.00,0.00,3.00): quality = 95.91%

- 1: site Si1 in phase CeSi2 (6.00,0.00,3.00): distance = 0.7346
- 2: site Mx1 in phase CeNiSi# (6.00,1.20,1.80): distance = 0.8609
- 3: site Si1 in phase CeSi (7.00,0.00,2.00): distance = 2.8307

site Ni6 (6.00,0.00,3.00): quality = 87.06%

- 1: site Si1 in phase CeSi2 (6.00,0.00,3.00): distance = 1.1137
- 2: site Mx1 in phase CeNiSi# (6.00,1.20,1.80): distance = 1.2631
- 3: site Si1 in phase CeSi (7.00,0.00,2.00): distance = 2.7652

site Si1 (7.00,1.00,1.00): quality = 85.46%

- 1: site Si1 in phase CeSi (7.00,0.00,2.00): distance = 1.1839
- 2: site Si1 in phase CeSi2 (6.00,0.00,3.00): distance = 2.6832
- 3: site Mx1 in phase CeNiSi# (6.00,1.20,1.80): distance = 2.7863

site Si2 (7.00,2.00,0.00): quality = 78.72%

- 1: site Si1 in phase CeSi (7.00,0.00,2.00): distance = 1.3816
- 2: site Si1 in phase CeSi2 (6.00,0.00,3.00): distance = 2.6299
- 3: site Mx1 in phase CeNiSi# (6.00,1.20,1.80): distance = 2.7334

site Si3 (6.00,2.00,1.00): quality = 92.82%

- 1: site Mx1 in phase CeNiSi# (6.00,1.20,1.80): distance = 0.9102
- 2: site Si1 in phase CeSi2 (6.00,0.00,3.00): distance = 1.0032
- 3: site Si1 in phase CeSi (7.00,0.00,2.00): distance = 2.7979

site Si4 (8.00,1.00,0.00): quality = 36.07%

- 1: site Si1 in phase CeSi (7.00,0.00,2.00): distance = 2.5860
- 2: site Si1 in phase CeSi2 (6.00,0.00,3.00): distance = 3.3632
- 3: site Mx1 in phase CeNiSi# (6.00,1.20,1.80): distance = 3.4448

site Si5 (8.00,1.00,0.00): quality = 37.47%

- 1: site Si1 in phase CeSi (7.00,0.00,2.00): distance = 2.5343
- 2: site Si1 in phase CeSi2 (6.00,0.00,3.00): distance = 3.4003
- 3: site Mx1 in phase CeNiSi# (6.00,1.20,1.80): distance = 3.4798

site Si6 (7.00,2.00,0.00): quality = 78.79%

- 1: site Si1 in phase CeSi (7.00,0.00,2.00): distance = 1.3796
- 2: site Si1 in phase CeSi2 (6.00,0.00,3.00): distance = 2.6779
- 3: site Mx1 in phase CeNiSi# (6.00,1.20,1.80): distance = 2.7795

site Si7 (7.00,2.00,0.00): quality = 71.66%

- 1: site Si1 in phase CeSi (7.00,0.00,2.00): distance = 1.5685
- 2: site Si1 in phase CeSi2 (6.00,0.00,3.00): distance = 2.9631
- 3: site Mx1 in phase CeNiSi# (6.00,1.20,1.80): distance = 3.0496

site Si8 (7.00,2.00,0.00): quality = 79.40%

- 1: site Si1 in phase CeSi (7.00,0.00,2.00): distance = 1.3628
- 2: site Si1 in phase CeSi2 (6.00,0.00,3.00): distance = 2.6233
- 3: site Mx1 in phase CeNiSi# (6.00,1.20,1.80): distance = 2.7245

site Si9 (7.00,1.00,1.00): quality = 85.93%

- 1: site Si1 in phase CeSi (7.00,0.00,2.00): distance = 1.1690
- 2: site Si1 in phase CeSi2 (6.00,0.00,3.00): distance = 2.6755
- 3: site Mx1 in phase CeNiSi# (6.00,1.20,1.80): distance = 2.7780

site Si10 (6.00,2.00,1.00): quality = 92.55%

- 1: site Mx1 in phase CeNiSi# (6.00,1.20,1.80): distance = 0.9227
- 2: site Si1 in phase CeSi2 (6.00,0.00,3.00): distance = 1.0028

3: site Si1 in phase CeSi (7.00,0.00,2.00): distance = 2.7922  
site Si11 (7.00,2.00,0.00): quality = 68.08%  
1: site Si1 in phase CeSi (7.00,0.00,2.00): distance = 1.6600  
2: site Si1 in phase CeSi2 (6.00,0.00,3.00): distance = 2.9916  
3: site Mx1 in phase CeNiSi# (6.00,1.20,1.80): distance = 3.0787

Decomposition of Ce14Ni6Si11:

CeSi: 65.34%

CeNiSi#: 18.70%

CeSi2: 15.93%

Overall decomposition quality: 81.33%

--- Analysis of phase Ce15Ni4Si13 ---

site Ce1 (10.00,2.00,3.00): quality = 71.50%  
1: site Ce1 in phase CeSi (10.00,0.00,7.00): distance = 3.3336  
2: site Mx1 in phase CeNiSi# (6.00,1.20,1.80): distance = 5.7603  
3: site Si1 in phase CeSi2 (6.00,0.00,3.00): distance = 5.7981  
site Ce2 (10.00,1.00,6.00): quality = 88.67%  
1: site Ce1 in phase CeSi (10.00,0.00,7.00): distance = 2.2815  
2: site Ce1 in phase CeSi2 (8.00,0.00,12.00): distance = 5.8649  
3: site Si1 in phase CeNi2Si2 (5.00,4.00,1.00): distance = 6.3832  
site Ce3 (10.00,1.50,5.50): quality = 88.15%  
1: site Ce1 in phase CeSi (10.00,0.00,7.00): distance = 2.3204  
2: site Ce1 in phase CeSi2 (8.00,0.00,12.00): distance = 5.6502  
3: site Si1 in phase CeNi2Si2 (5.00,4.00,1.00): distance = 6.3222  
site Ce4 (10.00,2.00,5.00): quality = 86.66%  
1: site Ce1 in phase CeSi (10.00,0.00,7.00): distance = 2.4274  
2: site Ce1 in phase CeSi2 (8.00,0.00,12.00): distance = 5.8533  
3: site Si1 in phase CeNi2Si2 (5.00,4.00,1.00): distance = 6.4733  
site Ce5 (8.00,2.00,10.00): quality = 96.88%  
1: site Ce1 in phase CeNiSi# (8.00,4.80,7.20): distance = 1.4409  
2: site Ce1 in phase CeSi2 (8.00,0.00,12.00): distance = 3.3836  
3: site Ce1 in phase CeNi2Si2 (4.00,8.00,10.00): distance = 5.4009  
site Ni1 (6.00,2.00,0.00): quality = 23.15%  
1: site Mx1 in phase CeNiSi# (6.00,1.20,1.80): distance = 3.1369  
2: site Si1 in phase CeSi2 (6.00,0.00,3.00): distance = 3.2033  
3: site Si1 in phase CeSi (7.00,0.00,2.00): distance = 3.5022  
site Mx1 (7.00,0.50,1.50): quality = 78.89%  
1: site Si1 in phase CeSi (7.00,0.00,2.00): distance = 1.3660  
2: site Si1 in phase CeSi2 (6.00,0.00,3.00): distance = 2.7846  
3: site Mx1 in phase CeNiSi# (6.00,1.20,1.80): distance = 2.8628  
site Mx2 (6.00,0.50,2.50): quality = 81.55%  
1: site Mx1 in phase CeNiSi# (6.00,1.20,1.80): distance = 1.2915  
2: site Si1 in phase CeSi2 (6.00,0.00,3.00): distance = 1.4781  
3: site Si1 in phase CeSi (7.00,0.00,2.00): distance = 2.8027  
site Si1 (8.00,0.50,0.50): quality = 43.73%  
1: site Si1 in phase CeSi (7.00,0.00,2.00): distance = 2.3240  
2: site Si1 in phase CeSi2 (6.00,0.00,3.00): distance = 3.4525  
3: site Mx1 in phase CeNiSi# (6.00,1.20,1.80): distance = 3.4955  
site Si2 (7.00,0.50,1.50): quality = 89.51%  
1: site Si1 in phase CeSi (7.00,0.00,2.00): distance = 1.0455  
2: site Si1 in phase CeSi2 (6.00,0.00,3.00): distance = 2.9218  
3: site Mx1 in phase CeNiSi# (6.00,1.20,1.80): distance = 3.0113  
site Si3 (6.00,0.50,2.50): quality = 89.00%  
1: site Si1 in phase CeSi2 (6.00,0.00,3.00): distance = 1.0645  
2: site Mx1 in phase CeNiSi# (6.00,1.20,1.80): distance = 1.1369  
3: site Si1 in phase CeSi (7.00,0.00,2.00): distance = 2.7311  
site Si4 (6.00,0.00,3.00): quality = 96.05%  
1: site Mx1 in phase CeNiSi# (6.00,1.20,1.80): distance = 0.7374  
2: site Si1 in phase CeSi2 (6.00,0.00,3.00): distance = 1.0398

3: site Si1 in phase CeSi (7.00,0.00,2.00): distance = 2.9382

Decomposition of Ce15Ni4Si13:

CeSi: 68.43%

CeNiSi#: 24.59%

CeSi2: 6.90%

Overall decomposition quality: 80.09%

--- Analysis of phase Ce2Ni15Si2# ---

site Ce1 (1.00,17.11,1.89): quality = 64.25%

1: site Ce1 in phase CeNi5 (2.00,18.00,0.00): distance = 3.7256

2: site Ce1 in phase CeNi2Si2 (4.00,8.00,10.00): distance = 5.0059

3: site Ce1 in phase CeSi2 (8.00,0.00,12.00): distance = 6.6823

site Ni1 (1.00,11.11,1.89): quality = 15.04%

1: site Ni1 in phase Ni3Si (0.00,8.00,4.00): distance = 3.7450

2: site Si1 in phase Ni3Si (0.00,12.00,0.00): distance = 3.7527

3: site Ni1 in phase CeNi5 (3.00,9.00,0.00): distance = 4.8923

site Mx1 (2.00,10.00,0.00): quality = 23.20%

1: site Si1 in phase Ni3Si (0.00,12.00,0.00): distance = 3.1655

2: site Ni1 in phase Ni3Si (0.00,8.00,4.00): distance = 3.1660

3: site Ni2 in phase CeNi5 (4.00,8.00,0.00): distance = 3.1914

site Ni3 (2.00,8.74,1.26): quality = 16.51%

1: site Ni1 in phase CeNi5 (3.00,9.00,0.00): distance = 3.6094

2: site Ni1 in phase CeNi2Si2 (4.00,4.00,4.00): distance = 4.0633

3: site Ni2 in phase CeNi5 (4.00,8.00,0.00): distance = 4.4107

site Ni4 (3.00,7.74,1.26): quality = 25.58%

1: site Ni2 in phase CeNi5 (4.00,8.00,0.00): distance = 3.0017

2: site Ni1 in phase CeNi5 (3.00,9.00,0.00): distance = 3.6090

3: site Ni1 in phase CeNi2Si2 (4.00,4.00,4.00): distance = 4.0767

Decomposition of Ce2Ni15Si2#:

CeNi5: 84.20%

Ni3Si: 11.07%

CeNi2Si2: 4.17%

Overall decomposition quality: 25.30%

--- Analysis of phase Ce2Ni17Si5# ---

site Ce1 (0.00,17.20,4.80): quality = 43.54%

1: site Ce1 in phase CeNi5 (2.00,18.00,0.00): distance = 4.9398

2: site Ce1 in phase CeNi2Si2 (4.00,8.00,10.00): distance = 5.7862

3: site Ce1 in phase CeNiSi# (8.00,4.80,7.20): distance = 7.5103

site Mx1 (2.00,8.00,4.00): quality = 21.65%

1: site Ni1 in phase Ni3Si (0.00,8.00,4.00): distance = 3.2492

2: site Si1 in phase Ni3Si (0.00,12.00,0.00): distance = 3.2625

3: site Ni2 in phase CeNi5 (4.00,8.00,0.00): distance = 3.4546

site Ni2 (2.00,7.60,2.40): quality = 14.84%

1: site Ni1 in phase CeNi5 (3.00,9.00,0.00): distance = 3.7647

2: site Ni1 in phase CeNi2Si2 (4.00,4.00,4.00): distance = 4.1476

3: site Ni1 in phase Ni3Si (0.00,8.00,4.00): distance = 4.4011

site Si2 (2.00,9.20,0.80): quality = 27.31%

1: site Si1 in phase Ni3Si (0.00,12.00,0.00): distance = 2.9612

2: site Ni1 in phase Ni3Si (0.00,8.00,4.00): distance = 2.9659

3: site Ni2 in phase CeNi5 (4.00,8.00,0.00): distance = 3.4118

Decomposition of Ce2Ni17Si5#:

CeNi5: 63.59%

Ni3Si: 24.48%

CeNi2Si2: 9.43%

Overall decomposition quality: 19.88%

--- Analysis of phase Ce<sub>2</sub>Ni<sub>3</sub>Si<sub>5</sub> ---

site Ce1 (4.00,7.00,10.00): quality = 76.39%

- 1: site Ce1 in phase CeNi<sub>2</sub>Si<sub>2</sub> (4.00,8.00,10.00): distance = 3.0627
- 2: site Ce1 in phase CeNi<sub>5</sub> (2.00,18.00,0.00): distance = 3.6569
- 3: site Ce1 in phase CeSi<sub>2</sub> (8.00,0.00,12.00): distance = 5.3249

site Ni1 (4.00,2.00,6.00): quality = 44.94%

- 1: site Ni1 in phase CeNi<sub>2</sub>Si<sub>2</sub> (4.00,4.00,4.00): distance = 2.2499
- 2: site Ni1 in phase CeNi<sub>5</sub> (3.00,9.00,0.00): distance = 2.4567
- 3: site Ni2 in phase CeNi<sub>5</sub> (4.00,8.00,0.00): distance = 3.5679

site Ni2 (5.00,0.00,5.00): quality = 72.01%

- 1: site Si1 in phase CeNi<sub>2</sub>Si<sub>2</sub> (5.00,4.00,1.00): distance = 1.5344
- 2: site Si1 in phase CeSi<sub>2</sub> (6.00,0.00,3.00): distance = 3.1804
- 3: site Mx1 in phase CeNiSi# (6.00,1.20,1.80): distance = 3.1999

site Si1 (4.00,4.00,4.00): quality = 69.17%

- 1: site Ni1 in phase CeNi<sub>2</sub>Si<sub>2</sub> (4.00,4.00,4.00): distance = 1.6321
- 2: site Ni1 in phase CeNi<sub>5</sub> (3.00,9.00,0.00): distance = 2.5067
- 3: site Mx1 in phase CeNiSi# (6.00,1.20,1.80): distance = 3.7712

site Si2 (4.00,3.00,5.00): quality = 72.35%

- 1: site Ni1 in phase CeNi<sub>2</sub>Si<sub>2</sub> (4.00,4.00,4.00): distance = 1.5506
- 2: site Ni1 in phase CeNi<sub>5</sub> (3.00,9.00,0.00): distance = 2.1857
- 3: site Ni2 in phase CeNi<sub>5</sub> (4.00,8.00,0.00): distance = 3.8041

site Si3 (4.00,3.00,2.00): quality = 37.81%

- 1: site Mx1 in phase CeNiSi# (6.00,1.20,1.80): distance = 2.5223
- 2: site Si1 in phase CeSi<sub>2</sub> (6.00,0.00,3.00): distance = 2.6101
- 3: site Si1 in phase CeNi<sub>2</sub>Si<sub>2</sub> (5.00,4.00,1.00): distance = 2.7629

Decomposition of Ce<sub>2</sub>Ni<sub>3</sub>Si<sub>5</sub>:

CeNi<sub>2</sub>Si<sub>2</sub>: 80.69%

CeNi<sub>5</sub>: 10.79%

CeNiSi#: 4.97%

Overall decomposition quality: 63.12%

--- Analysis of phase Ce<sub>3</sub>Ni<sub>2</sub>Si<sub>8</sub> ---

site Ce1 (4.00,2.00,16.00): quality = 89.08%

- 1: site Ce1 in phase CeNi<sub>2</sub>Si<sub>2</sub> (4.00,8.00,10.00): distance = 2.2498
- 2: site Ce1 in phase CeNi<sub>5</sub> (2.00,18.00,0.00): distance = 3.5919
- 3: site Ce1 in phase CeNiSi# (8.00,4.80,7.20): distance = 5.2332

site Ce2 (6.00,4.00,11.00): quality = 52.47%

- 1: site Ce1 in phase CeSi<sub>2</sub> (8.00,0.00,12.00): distance = 4.3831
- 2: site Ce1 in phase CeNi<sub>2</sub>Si<sub>2</sub> (4.00,8.00,10.00): distance = 5.3511
- 3: site Ce1 in phase CeNiSi# (8.00,4.80,7.20): distance = 5.3578

site Ni1 (5.00,0.00,5.00): quality = 71.22%

- 1: site Si1 in phase CeNi<sub>2</sub>Si<sub>2</sub> (5.00,4.00,1.00): distance = 1.5545
- 2: site Si1 in phase CeSi<sub>2</sub> (6.00,0.00,3.00): distance = 3.2750
- 3: site Mx1 in phase CeNiSi# (6.00,1.20,1.80): distance = 3.2868

site Si1 (4.00,2.00,6.00): quality = 82.56%

- 1: site Ni1 in phase CeNi<sub>2</sub>Si<sub>2</sub> (4.00,4.00,4.00): distance = 1.2725
- 2: site Ni1 in phase CeNi<sub>5</sub> (3.00,9.00,0.00): distance = 2.3576
- 3: site Ni2 in phase CeNi<sub>5</sub> (4.00,8.00,0.00): distance = 3.8705

site Si2 (6.00,1.00,2.00): quality = 92.74%

- 1: site Si1 in phase CeSi<sub>2</sub> (6.00,0.00,3.00): distance = 0.9142
- 2: site Mx1 in phase CeNiSi# (6.00,1.20,1.80): distance = 1.0820
- 3: site Si1 in phase CeSi (7.00,0.00,2.00): distance = 2.7275

site Si3 (4.00,2.00,6.00): quality = 81.92%

- 1: site Ni1 in phase CeNi<sub>2</sub>Si<sub>2</sub> (4.00,4.00,4.00): distance = 1.2912
- 2: site Ni1 in phase CeNi<sub>5</sub> (3.00,9.00,0.00): distance = 2.4112
- 3: site Ni2 in phase CeNi<sub>5</sub> (4.00,8.00,0.00): distance = 3.9065

site Si4 (5.00,0.00,5.00): quality = 72.29%

- 1: site Si1 in phase CeNi<sub>2</sub>Si<sub>2</sub> (5.00,4.00,1.00): distance = 1.5522
- 2: site Si1 in phase CeSi<sub>2</sub> (6.00,0.00,3.00): distance = 3.0736

3: site Mx1 in phase CeNiSi# (6.00,1.20,1.80): distance = 3.0831

Decomposition of Ce<sub>3</sub>Ni<sub>2</sub>Si<sub>8</sub>:

CeNi<sub>2</sub>Si<sub>2</sub>: 67.46%

CeSi<sub>2</sub>: 24.66%

CeNiSi#: 6.54%

Overall decomposition quality: 76.58%

--- Analysis of phase Ce<sub>3</sub>Ni<sub>4</sub>Si<sub>4</sub> ---

site Ce1 (8.00,4.00,8.00): quality = 95.50%

1: site Ce1 in phase CeNiSi# (8.00,4.80,7.20): distance = 1.6363

2: site Ce1 in phase CeSi<sub>2</sub> (8.00,0.00,12.00): distance = 3.0938

3: site Ce1 in phase CeNi<sub>2</sub>Si<sub>2</sub> (4.00,8.00,10.00): distance = 5.4767

site Ce2 (6.00,8.00,7.00): quality = 50.37%

1: site Ce1 in phase CeSi<sub>2</sub> (8.00,0.00,12.00): distance = 4.5077

2: site Ce1 in phase CeNi<sub>2</sub>Si<sub>2</sub> (4.00,8.00,10.00): distance = 5.2844

3: site Ce1 in phase CeNiSi# (8.00,4.80,7.20): distance = 5.3993

site Ni1 (6.00,0.00,3.00): quality = 99.12%

1: site Si1 in phase CeSi<sub>2</sub> (6.00,0.00,3.00): distance = 0.4357

2: site Mx1 in phase CeNiSi# (6.00,1.20,1.80): distance = 0.9693

3: site Si1 in phase CeSi (7.00,0.00,2.00): distance = 2.8491

site Ni2 (4.00,4.00,4.00): quality = 78.95%

1: site Ni1 in phase CeNi<sub>2</sub>Si<sub>2</sub> (4.00,4.00,4.00): distance = 1.3532

2: site Ni1 in phase CeNi<sub>5</sub> (3.00,9.00,0.00): distance = 2.4116

3: site Mx1 in phase CeNiSi# (6.00,1.20,1.80): distance = 3.8567

site Si1 (5.00,5.00,0.00): quality = 81.83%

1: site Si1 in phase CeNi<sub>2</sub>Si<sub>2</sub> (5.00,4.00,1.00): distance = 1.2937

2: site Si1 in phase CeSi<sub>2</sub> (6.00,0.00,3.00): distance = 3.0769

3: site Mx1 in phase CeNiSi# (6.00,1.20,1.80): distance = 3.0831

site Si2 (6.00,2.00,1.00): quality = 93.05%

1: site Si1 in phase CeSi<sub>2</sub> (6.00,0.00,3.00): distance = 0.8998

2: site Mx1 in phase CeNiSi# (6.00,1.20,1.80): distance = 1.0881

3: site Si1 in phase CeSi (7.00,0.00,2.00): distance = 2.7824

Decomposition of Ce<sub>3</sub>Ni<sub>4</sub>Si<sub>4</sub>:

CeSi<sub>2</sub>: 42.73%

CeNi<sub>2</sub>Si<sub>2</sub>: 31.58%

CeNiSi#: 24.87%

Overall decomposition quality: 82.01%

--- Analysis of phase Ce<sub>3</sub>Ni<sub>6</sub>Si<sub>2</sub> ---

site Ce1 (5.00,8.00,4.00): quality = 33.16%

1: site Ce1 in phase CeSi (10.00,0.00,7.00): distance = 5.7219

2: site Ce1 in phase CeNiSi# (8.00,4.80,7.20): distance = 5.9420

3: site Ce1 in phase CeSi<sub>2</sub> (8.00,0.00,12.00): distance = 6.2837

site Ni1 (4.00,6.00,2.00): quality = 57.52%

1: site Ni1 in phase CeNi<sub>5</sub> (3.00,9.00,0.00): distance = 1.9006

2: site Ni1 in phase CeNi<sub>2</sub>Si<sub>2</sub> (4.00,4.00,4.00): distance = 2.2000

3: site Ni2 in phase CeNi<sub>5</sub> (4.00,8.00,0.00): distance = 3.6263

site Si1 (6.00,6.00,0.00): quality = 43.74%

1: site Ni2 in phase CeNi<sub>5</sub> (4.00,8.00,0.00): distance = 2.3238

2: site Ni1 in phase CeNi<sub>2</sub>Si<sub>2</sub> (4.00,4.00,4.00): distance = 4.0207

3: site Ni1 in phase CeNi<sub>5</sub> (3.00,9.00,0.00): distance = 4.0410

Decomposition of Ce<sub>3</sub>Ni<sub>6</sub>Si<sub>2</sub>:

CeNi<sub>5</sub>: 60.12%

CeSi: 14.97%

CeNi<sub>2</sub>Si<sub>2</sub>: 11.02%

Overall decomposition quality: 48.37%



--- Analysis of phase Ce<sub>3</sub>NiSi<sub>3</sub># ---

site Ce1 (10.00,0.88,6.12): quality = 88.58%

- 1: site Ce1 in phase CeSi (10.00,0.00,7.00): distance = 2.2879
- 2: site Ce1 in phase CeSi<sub>2</sub> (8.00,0.00,12.00): distance = 5.5932
- 3: site Si1 in phase CeNi<sub>2</sub>Si<sub>2</sub> (5.00,4.00,1.00): distance = 6.4222

site Ce2 (8.00,3.52,8.48): quality = 96.72%

- 1: site Ce1 in phase CeNiSi# (8.00,4.80,7.20): distance = 1.4668
- 2: site Ce1 in phase CeSi<sub>2</sub> (8.00,0.00,12.00): distance = 3.6129
- 3: site Ce1 in phase CeNi<sub>2</sub>Si<sub>2</sub> (4.00,8.00,10.00): distance = 5.3801

site Mx1 (6.00,0.44,2.56): quality = 94.50%

- 1: site Mx1 in phase CeNiSi# (6.00,1.20,1.80): distance = 0.8225
- 2: site Si1 in phase CeSi<sub>2</sub> (6.00,0.00,3.00): distance = 0.8363
- 3: site Si1 in phase CeSi (7.00,0.00,2.00): distance = 2.8288

site Si1 (7.00,0.88,1.12): quality = 86.37%

- 1: site Si1 in phase CeSi (7.00,0.00,2.00): distance = 1.1548
- 2: site Si1 in phase CeSi<sub>2</sub> (6.00,0.00,3.00): distance = 2.6565
- 3: site Mx1 in phase CeNiSi# (6.00,1.20,1.80): distance = 2.7570

Decomposition of Ce<sub>3</sub>NiSi<sub>3</sub>#:

CeSi: 57.89%

CeNiSi#: 31.82%

CeSi<sub>2</sub>: 10.28%

Overall decomposition quality: 90.80%

--- Analysis of phase Ce<sub>5</sub>Ni<sub>2</sub>Si<sub>3</sub> ---

site Ce1 (10.00,2.90,2.10): quality = 74.17%

- 1: site Ce1 in phase CeSi (10.00,0.00,7.00): distance = 3.1870
- 2: site Si1 in phase CeNi<sub>2</sub>Si<sub>2</sub> (5.00,4.00,1.00): distance = 5.8243
- 3: site Si1 in phase CeSi<sub>2</sub> (6.00,0.00,3.00): distance = 5.8776

site Ce2 (10.00,2.30,4.70): quality = 88.82%

- 1: site Ce1 in phase CeSi (10.00,0.00,7.00): distance = 2.2700
- 2: site Ce1 in phase CeSi<sub>2</sub> (8.00,0.00,12.00): distance = 5.7313
- 3: site Si1 in phase CeNi<sub>2</sub>Si<sub>2</sub> (5.00,4.00,1.00): distance = 6.3585

site Ce3 (10.00,2.00,5.00): quality = 88.73%

- 1: site Ce1 in phase CeSi (10.00,0.00,7.00): distance = 2.2772
- 2: site Ce1 in phase CeSi<sub>2</sub> (8.00,0.00,12.00): distance = 5.6036
- 3: site Si1 in phase CeNi<sub>2</sub>Si<sub>2</sub> (5.00,4.00,1.00): distance = 6.3437

site Ce4 (8.00,4.20,7.80): quality = 94.51%

- 1: site Ce1 in phase CeNiSi# (8.00,4.80,7.20): distance = 1.7538
- 2: site Ce1 in phase CeSi<sub>2</sub> (8.00,0.00,12.00): distance = 3.7050
- 3: site Ce1 in phase CeNi<sub>2</sub>Si<sub>2</sub> (4.00,8.00,10.00): distance = 5.5249

site Ni1 (6.00,2.00,0.00): quality = 23.36%

- 1: site Mx1 in phase CeNiSi# (6.00,1.20,1.80): distance = 3.1245
- 2: site Si1 in phase CeSi<sub>2</sub> (6.00,0.00,3.00): distance = 3.1880
- 3: site Si1 in phase CeSi (7.00,0.00,2.00): distance = 3.4397

site Mx1 (8.00,0.70,0.30): quality = 37.12%

- 1: site Si1 in phase CeSi (7.00,0.00,2.00): distance = 2.5349
- 2: site Si1 in phase CeSi<sub>2</sub> (6.00,0.00,3.00): distance = 3.3813
- 3: site Mx1 in phase CeNiSi# (6.00,1.20,1.80): distance = 3.4301

site Mx2 (6.00,0.30,2.70): quality = 87.24%

- 1: site Si1 in phase CeSi<sub>2</sub> (6.00,0.00,3.00): distance = 1.1133
- 2: site Mx1 in phase CeNiSi# (6.00,1.20,1.80): distance = 1.1334
- 3: site Si1 in phase CeSi (7.00,0.00,2.00): distance = 2.7948

site Si1 (7.00,1.40,0.60): quality = 80.97%

- 1: site Si1 in phase CeSi (7.00,0.00,2.00): distance = 1.3185
- 2: site Si1 in phase CeSi<sub>2</sub> (6.00,0.00,3.00): distance = 2.5510
- 3: site Mx1 in phase CeNiSi# (6.00,1.20,1.80): distance = 2.6568

Decomposition of Ce<sub>5</sub>Ni<sub>2</sub>Si<sub>3</sub>:

CeSi: 79.43%

CeNiSi#: 13.93%

CeSi2: 6.53%

Overall decomposition quality: 74.45%

--- Analysis of phase Ce6Ni2Si3# ---

site Ce1 (10.00,1.67,5.34): quality = 89.46%

- 1: site Ce1 in phase CeSi (10.00,0.00,7.00): distance = 2.2203
- 2: site Ce1 in phase CeSi2 (8.00,0.00,12.00): distance = 5.7885
- 3: site Si1 in phase CeNi2Si2 (5.00,4.00,1.00): distance = 6.3669

site Ce2 (10.00,3.00,2.00): quality = 74.36%

- 1: site Ce1 in phase CeSi (10.00,0.00,7.00): distance = 3.1765
- 2: site Si1 in phase CeNi2Si2 (5.00,4.00,1.00): distance = 5.8471
- 3: site Si1 in phase CeSi2 (6.00,0.00,3.00): distance = 5.8922

site Mx1 (8.00,0.00,1.00): quality = 38.57%

- 1: site Si1 in phase CeSi (7.00,0.00,2.00): distance = 2.4822
- 2: site Si1 in phase CeSi2 (6.00,0.00,3.00): distance = 3.3934
- 3: site Mx1 in phase CeNiSi# (6.00,1.20,1.80): distance = 3.4412

site Ni2 (6.00,2.00,0.00): quality = 23.34%

- 1: site Mx1 in phase CeNiSi# (6.00,1.20,1.80): distance = 3.1254
- 2: site Si1 in phase CeSi2 (6.00,0.00,3.00): distance = 3.1894
- 3: site Si1 in phase CeSi (7.00,0.00,2.00): distance = 3.4501

site Si2 (6.00,1.00,2.00): quality = 80.41%

- 1: site Mx1 in phase CeNiSi# (6.00,1.20,1.80): distance = 1.3345
- 2: site Si1 in phase CeSi2 (6.00,0.00,3.00): distance = 1.3989
- 3: site Si1 in phase CeSi (7.00,0.00,2.00): distance = 2.8595

Decomposition of Ce6Ni2Si3#:

CeSi: 91.01%

CeNiSi#: 5.00%

CeSi2: 3.79%

Overall decomposition quality: 64.63%

--- Analysis of phase Ce6Ni7Si4 ---

site Ce1 (6.00,8.00,4.00): quality = 54.27%

- 1: site Ce1 in phase CeSi2 (8.00,0.00,12.00): distance = 4.2782
- 2: site Ce1 in phase CeSi (10.00,0.00,7.00): distance = 4.5412
- 3: site Ce1 in phase CeNiSi# (8.00,4.80,7.20): distance = 5.3444

site Ce2 (7.00,7.00,4.00): quality = 56.69%

- 1: site Ce1 in phase CeSi (10.00,0.00,7.00): distance = 4.1408
- 2: site Ce1 in phase CeSi2 (8.00,0.00,12.00): distance = 5.0961
- 3: site Ce1 in phase CeNiSi# (8.00,4.80,7.20): distance = 5.9272

site Ce3 (8.00,5.00,4.00): quality = 72.74%

- 1: site Ce1 in phase CeSi (10.00,0.00,7.00): distance = 3.2659
- 2: site Ce1 in phase CeSi2 (8.00,0.00,12.00): distance = 5.2884
- 3: site Ce1 in phase CeNiSi# (8.00,4.80,7.20): distance = 5.5187

site Ce4 (8.00,8.00,4.00): quality = 85.61%

- 1: site Ce1 in phase CeSi2 (8.00,0.00,12.00): distance = 2.4999
- 2: site Ce1 in phase CeNiSi# (8.00,4.80,7.20): distance = 3.7168
- 3: site Ce1 in phase CeSi (10.00,0.00,7.00): distance = 5.6100

site Ni1 (6.00,2.00,1.00): quality = 65.24%

- 1: site Si1 in phase CeSi2 (6.00,0.00,3.00): distance = 1.7046
- 2: site Mx1 in phase CeNiSi# (6.00,1.20,1.80): distance = 1.8492
- 3: site Si1 in phase CeSi (7.00,0.00,2.00): distance = 2.5276

site Ni2 (6.00,1.00,3.00): quality = 33.40%

- 1: site Mx1 in phase CeNiSi# (6.00,1.20,1.80): distance = 2.6465
- 2: site Si1 in phase CeSi2 (6.00,0.00,3.00): distance = 2.6693
- 3: site Si1 in phase CeNi2Si2 (5.00,4.00,1.00): distance = 3.2869

site Ni3 (6.00,1.00,3.00): quality = 34.18%

- 1: site Mx1 in phase CeNiSi# (6.00,1.20,1.80): distance = 2.6158
- 2: site Si1 in phase CeSi2 (6.00,0.00,3.00): distance = 2.6364
- 3: site Si1 in phase CeNi2Si2 (5.00,4.00,1.00): distance = 3.2780

site Ni4 (7.00,0.00,2.00): quality = 55.83%  
1: site Si1 in phase CeSi (7.00,0.00,2.00): distance = 1.9447  
2: site Si1 in phase CeSi2 (6.00,0.00,3.00): distance = 2.7660  
3: site Mx1 in phase CeNiSi# (6.00,1.20,1.80): distance = 2.8333  
site Si1 (6.00,4.00,0.00): quality = 41.69%  
1: site Si1 in phase CeNi2Si2 (5.00,4.00,1.00): distance = 2.3895  
2: site Si1 in phase CeSi2 (6.00,0.00,3.00): distance = 2.5756  
3: site Mx1 in phase CeNiSi# (6.00,1.20,1.80): distance = 2.5904  
site Si2 (6.00,4.00,0.00): quality = 48.66%  
1: site Si1 in phase CeNi2Si2 (5.00,4.00,1.00): distance = 2.1754  
2: site Mx1 in phase CeNiSi# (6.00,1.20,1.80): distance = 2.5991  
3: site Si1 in phase CeSi2 (6.00,0.00,3.00): distance = 2.6128  
Decomposition of Ce6Ni7Si4:  
CeSi2: 39.05%  
CeSi: 37.59%  
CeNiSi#: 13.32%  
Overall decomposition quality: 51.91%

--- Analysis of phase Ce7Ni2Si5 ---  
site Ce1 (10.00,2.00,5.00): quality = 83.67%  
1: site Ce1 in phase CeSi (10.00,0.00,7.00): distance = 2.6277  
2: site Ce1 in phase CeSi2 (8.00,0.00,12.00): distance = 5.4147  
3: site Si1 in phase CeNi2Si2 (5.00,4.00,1.00): distance = 6.5179  
site Ce2 (9.00,2.00,6.00): quality = 68.23%  
1: site Ce1 in phase CeSi (10.00,0.00,7.00): distance = 3.5109  
2: site Ce1 in phase CeSi2 (8.00,0.00,12.00): distance = 5.5958  
3: site Ce1 in phase CeNiSi# (8.00,4.80,7.20): distance = 5.9365  
site Ce3 (9.00,2.00,6.00): quality = 77.19%  
1: site Ce1 in phase CeSi (10.00,0.00,7.00): distance = 3.0173  
2: site Ce1 in phase CeSi2 (8.00,0.00,12.00): distance = 5.8023  
3: site Si1 in phase CeNi2Si2 (5.00,4.00,1.00): distance = 6.0726  
site Ce4 (10.00,2.00,5.00): quality = 87.99%  
1: site Ce1 in phase CeSi (10.00,0.00,7.00): distance = 2.3320  
2: site Ce1 in phase CeSi2 (8.00,0.00,12.00): distance = 5.6902  
3: site Si1 in phase CeNi2Si2 (5.00,4.00,1.00): distance = 6.4127  
site Ce5 (11.00,1.00,5.00): quality = 83.43%  
1: site Ce1 in phase CeSi (10.00,0.00,7.00): distance = 2.6426  
2: site Ce1 in phase CeSi2 (8.00,0.00,12.00): distance = 5.2941  
3: site Si1 in phase CeNi2Si2 (5.00,4.00,1.00): distance = 6.3271  
site Ce6 (11.00,1.00,5.00): quality = 81.37%  
1: site Ce1 in phase CeSi (10.00,0.00,7.00): distance = 2.7712  
2: site Ce1 in phase CeSi2 (8.00,0.00,12.00): distance = 5.4027  
3: site Si1 in phase CeNi2Si2 (5.00,4.00,1.00): distance = 6.2479  
site Ce7 (10.00,2.00,5.00): quality = 89.09%  
1: site Ce1 in phase CeSi (10.00,0.00,7.00): distance = 2.2495  
2: site Ce1 in phase CeSi2 (8.00,0.00,12.00): distance = 5.7766  
3: site Si1 in phase CeNi2Si2 (5.00,4.00,1.00): distance = 6.1599  
site Ni1 (6.00,0.00,3.00): quality = 80.72%  
1: site Si1 in phase CeSi2 (6.00,0.00,3.00): distance = 1.3045  
2: site Mx1 in phase CeNiSi# (6.00,1.20,1.80): distance = 1.5069  
3: site Si1 in phase CeSi (7.00,0.00,2.00): distance = 2.8066  
site Ni2 (6.00,0.00,3.00): quality = 73.44%  
1: site Si1 in phase CeSi2 (6.00,0.00,3.00): distance = 1.4981  
2: site Mx1 in phase CeNiSi# (6.00,1.20,1.80): distance = 1.5640  
3: site Si1 in phase CeSi (7.00,0.00,2.00): distance = 2.6900  
site Si1 (7.00,2.00,0.00): quality = 69.80%  
1: site Si1 in phase CeSi (7.00,0.00,2.00): distance = 1.6160  
2: site Si1 in phase CeSi2 (6.00,0.00,3.00): distance = 2.9664  
3: site Mx1 in phase CeNiSi# (6.00,1.20,1.80): distance = 3.0509

site Si2 (7.00,1.00,1.00): quality = 75.88%  
1: site Si1 in phase CeSi (7.00,0.00,2.00): distance = 1.4582  
2: site Si1 in phase CeSi2 (6.00,0.00,3.00): distance = 2.5292  
3: site Mx1 in phase CeNiSi# (6.00,1.20,1.80): distance = 2.6127  
site Si3 (7.00,1.00,1.00): quality = 82.04%  
1: site Si1 in phase CeSi (7.00,0.00,2.00): distance = 1.2878  
2: site Si1 in phase CeSi2 (6.00,0.00,3.00): distance = 2.7843  
3: site Mx1 in phase CeNiSi# (6.00,1.20,1.80): distance = 2.8814  
site Si4 (8.00,1.00,0.00): quality = 38.06%  
1: site Si1 in phase CeSi (7.00,0.00,2.00): distance = 2.5132  
2: site Si1 in phase CeSi2 (6.00,0.00,3.00): distance = 3.3373  
3: site Mx1 in phase CeNiSi# (6.00,1.20,1.80): distance = 3.4192  
site Si5 (8.00,1.00,0.00): quality = 33.42%  
1: site Si1 in phase CeSi (7.00,0.00,2.00): distance = 2.6884  
2: site Si1 in phase CeSi2 (6.00,0.00,3.00): distance = 3.4723  
3: site Mx1 in phase CeNiSi# (6.00,1.20,1.80): distance = 3.5491

Decomposition of Ce7Ni2Si5:

CeSi: 89.82%

CeSi2: 6.66%

CeNiSi#: 3.48%

Overall decomposition quality: 73.17%

--- Analysis of phase CeNi4Si ---

site Ce1 (2.00,14.00,4.00): quality = 99.01%  
1: site Ce1 in phase CeNi5 (2.00,18.00,0.00): distance = 0.9775  
2: site Ce1 in phase CeNi2Si2 (4.00,8.00,10.00): distance = 3.6373  
3: site Ce1 in phase CeNiSi# (8.00,4.80,7.20): distance = 5.4135  
site Ni1 (3.00,7.00,2.00): quality = 94.22%  
1: site Ni1 in phase CeNi5 (3.00,9.00,0.00): distance = 0.8292  
2: site Ni1 in phase CeNi2Si2 (4.00,4.00,4.00): distance = 2.3017  
3: site Ni2 in phase CeNi5 (4.00,8.00,0.00): distance = 3.2811  
site Ni2 (4.00,6.00,2.00): quality = 90.27%  
1: site Ni2 in phase CeNi5 (4.00,8.00,0.00): distance = 1.0008  
2: site Ni1 in phase CeNi5 (3.00,9.00,0.00): distance = 3.2016  
3: site Ni1 in phase CeNi2Si2 (4.00,4.00,4.00): distance = 3.7154  
site Si1 (4.00,8.00,0.00): quality = 81.88%  
1: site Ni2 in phase CeNi5 (4.00,8.00,0.00): distance = 1.2924  
2: site Ni1 in phase CeNi5 (3.00,9.00,0.00): distance = 3.2767  
3: site Ni1 in phase CeNi2Si2 (4.00,4.00,4.00): distance = 3.8280

Decomposition of CeNi4Si:

CeNi5: 99.89%

CeNi2Si2: 0.11%

CeNiSi#: 0.00%

Overall decomposition quality: 91.64%

--- Analysis of phase CeNi6Si6 ---

site Ce1 (0.00,12.00,12.00): quality = 31.25%  
1: site Ce1 in phase CeNi5 (2.00,18.00,0.00): distance = 5.8917  
2: site Ce1 in phase CeNi2Si2 (4.00,8.00,10.00): distance = 6.6327  
3: site Ce1 in phase CeNiSi# (8.00,4.80,7.20): distance = 8.1575  
site Ce2 (0.00,12.00,12.00): quality = 31.23%  
1: site Ce1 in phase CeNi5 (2.00,18.00,0.00): distance = 5.8935  
2: site Ce1 in phase CeNi2Si2 (4.00,8.00,10.00): distance = 6.6345  
3: site Ce1 in phase CeNiSi# (8.00,4.80,7.20): distance = 8.1586  
site Ni1 (2.00,2.00,7.00): quality = 16.52%  
1: site Ni1 in phase CeNi5 (3.00,9.00,0.00): distance = 3.6081  
2: site Ni1 in phase CeNi2Si2 (4.00,4.00,4.00): distance = 3.8112  
3: site Mx1 in phase CeNiSi# (6.00,1.20,1.80): distance = 3.9351  
site Mx1 (2.00,4.50,4.50): quality = 17.84%

1: site Ni1 in phase CeNi5 (3.00,9.00,0.00): distance = 3.5268  
 2: site Ni1 in phase CeNi2Si2 (4.00,4.00,4.00): distance = 3.7233  
 3: site Mx1 in phase CeNiSi# (6.00,1.20,1.80): distance = 3.9791  
 site Ni3 (2.00,4.00,5.00): quality = 18.02%  
 1: site Ni1 in phase CeNi5 (3.00,9.00,0.00): distance = 3.4842  
 2: site Ni1 in phase CeNi2Si2 (4.00,4.00,4.00): distance = 3.6585  
 3: site Mx1 in phase CeNiSi# (6.00,1.20,1.80): distance = 3.8974  
 site Si1 (2.00,7.00,2.00): quality = 17.41%  
 1: site Ni1 in phase CeNi5 (3.00,9.00,0.00): distance = 3.5899  
 2: site Ni1 in phase CeNi2Si2 (4.00,4.00,4.00): distance = 3.8155  
 3: site Mx1 in phase CeNiSi# (6.00,1.20,1.80): distance = 3.9708  
 site Si3 (2.00,5.00,4.00): quality = 18.29%  
 1: site Ni1 in phase CeNi5 (3.00,9.00,0.00): distance = 3.5195  
 2: site Ni1 in phase CeNi2Si2 (4.00,4.00,4.00): distance = 3.7076  
 3: site Mx1 in phase CeNiSi# (6.00,1.20,1.80): distance = 3.9046  
 Decomposition of CeNi6Si6:  
 CeNi5: 64.12%  
 CeNi2Si2: 21.61%  
 CeNiSi#: 7.01%  
 Overall decomposition quality: 18.70%

--- Analysis of phase CeNi8Si5# ---  
 site Ce1 (0.00,14.88,9.12): quality = 31.34%  
 1: site Ce1 in phase CeNi5 (2.00,18.00,0.00): distance = 5.8828  
 2: site Ce1 in phase CeNi2Si2 (4.00,8.00,10.00): distance = 6.6343  
 3: site Ce1 in phase CeNiSi# (8.00,4.80,7.20): distance = 8.1575  
 site Mx1 (0.00,7.44,4.56): quality = 92.63%  
 1: site Ni1 in phase Ni3Si (0.00,8.00,4.00): distance = 0.9098  
 2: site Si1 in phase Ni3Si (0.00,12.00,0.00): distance = 1.2815  
 3: site Ni2 in phase CeNi5 (4.00,8.00,0.00): distance = 4.4957  
 site Mx2 (2.00,6.20,3.80): quality = 13.43%  
 1: site Ni1 in phase CeNi5 (3.00,9.00,0.00): distance = 3.9377  
 2: site Ni1 in phase Ni3Si (0.00,8.00,4.00): distance = 4.2221  
 3: site Si1 in phase Ni3Si (0.00,12.00,0.00): distance = 4.2389  
 Decomposition of CeNi8Si5#:  
 CeNi5: 48.97%  
 Ni3Si: 37.85%  
 CeNi2Si2: 9.96%  
 Overall decomposition quality: 20.36%

--- Analysis of phase CeNi9Si4 ---  
 site Ce1 (0.00,16.00,8.00): quality = 31.31%  
 1: site Ce1 in phase CeNi5 (2.00,18.00,0.00): distance = 5.8858  
 2: site Ce1 in phase CeNi2Si2 (4.00,8.00,10.00): distance = 6.6348  
 3: site Ce1 in phase CeNiSi# (8.00,4.80,7.20): distance = 8.1575  
 site Ni1 (2.00,6.00,4.00): quality = 12.07%  
 1: site Ni1 in phase CeNi5 (3.00,9.00,0.00): distance = 4.0759  
 2: site Ni1 in phase Ni3Si (0.00,8.00,4.00): distance = 4.0763  
 3: site Si1 in phase Ni3Si (0.00,12.00,0.00): distance = 4.0996  
 site Ni2 (2.00,7.00,4.00): quality = 13.54%  
 1: site Ni1 in phase CeNi5 (3.00,9.00,0.00): distance = 3.9012  
 2: site Ni1 in phase CeNi2Si2 (4.00,4.00,4.00): distance = 4.2312  
 3: site Ni1 in phase Ni3Si (0.00,8.00,4.00): distance = 4.2331  
 site Ni3 (0.00,8.00,4.00): quality = 92.19%  
 1: site Ni1 in phase Ni3Si (0.00,8.00,4.00): distance = 0.9236  
 2: site Si1 in phase Ni3Si (0.00,12.00,0.00): distance = 1.2999  
 3: site Ni2 in phase CeNi5 (4.00,8.00,0.00): distance = 4.4683  
 site Si1 (2.00,9.00,1.00): quality = 12.78%  
 1: site Ni1 in phase CeNi5 (3.00,9.00,0.00): distance = 4.0536

2: site Si1 in phase Ni3Si (0.00,12.00,0.00): distance = 4.0700  
3: site Ni1 in phase Ni3Si (0.00,8.00,4.00): distance = 4.0730  
Decomposition of CeNi9Si4:  
Ni3Si: 44.77%  
CeNi5: 41.66%  
CeNi2Si2: 9.01%  
Overall decomposition quality: 19.79%

--- Analysis of phase CeNiSi ---  
site Ce1 (8.00,6.00,6.00): quality = 94.53%  
1: site Ce1 in phase CeSi2 (8.00,0.00,12.00): distance = 1.7521  
2: site Ce1 in phase CeNiSi# (8.00,4.80,7.20): distance = 3.1606  
3: site Ce1 in phase CeSi (10.00,0.00,7.00): distance = 5.8570  
site Ni1 (6.00,0.00,3.00): quality = 97.80%  
1: site Si1 in phase CeSi2 (6.00,0.00,3.00): distance = 0.5938  
2: site Mx1 in phase CeNiSi# (6.00,1.20,1.80): distance = 1.0412  
3: site Si1 in phase CeSi (7.00,0.00,2.00): distance = 2.8038  
site Si1 (6.00,3.00,0.00): quality = 90.03%  
1: site Si1 in phase CeSi2 (6.00,0.00,3.00): distance = 1.0259  
2: site Mx1 in phase CeNiSi# (6.00,1.20,1.80): distance = 1.1131  
3: site Si1 in phase CeSi (7.00,0.00,2.00): distance = 2.8027  
Decomposition of CeNiSi:  
CeSi2: 85.54%  
CeNiSi#: 14.44%  
CeSi: 0.01%  
Overall decomposition quality: 94.12%

--- Analysis of phase CeNiSi2 ---  
site Ce1 (6.00,5.00,10.00): quality = 51.22%  
1: site Ce1 in phase CeSi2 (8.00,0.00,12.00): distance = 4.4564  
2: site Ce1 in phase CeNi2Si2 (4.00,8.00,10.00): distance = 5.2913  
3: site Ce1 in phase CeNiSi# (8.00,4.80,7.20): distance = 5.3379  
site Ni1 (5.00,0.00,5.00): quality = 69.94%  
1: site Si1 in phase CeNi2Si2 (5.00,4.00,1.00): distance = 1.5867  
2: site Si1 in phase CeSi2 (6.00,0.00,3.00): distance = 3.2231  
3: site Mx1 in phase CeNiSi# (6.00,1.20,1.80): distance = 3.2321  
site Si1 (6.00,1.00,2.00): quality = 92.36%  
1: site Si1 in phase CeSi2 (6.00,0.00,3.00): distance = 0.9308  
2: site Mx1 in phase CeNiSi# (6.00,1.20,1.80): distance = 1.1671  
3: site Si1 in phase CeSi (7.00,0.00,2.00): distance = 2.7194  
site Si2 (4.00,4.00,4.00): quality = 77.67%  
1: site Ni1 in phase CeNi2Si2 (4.00,4.00,4.00): distance = 1.4102  
2: site Ni1 in phase CeNi5 (3.00,9.00,0.00): distance = 2.3395  
3: site Ni2 in phase CeNi5 (4.00,8.00,0.00): distance = 3.8482  
Decomposition of CeNiSi2:  
CeNi2Si2: 46.32%  
CeSi2: 42.52%  
CeNiSi#: 9.89%  
Overall decomposition quality: 72.80%

## S4. Distance Matrix between All Ce-Ni-Si Ternary Phases

|             | Ce14Ni6Si11 | Ce15Ni4Si13 | Ce2Ni15Si2# | Ce2Ni17Si5# | Ce2Ni3Si5 | Ce3Ni2Si8 | Ce3Ni4Si4 |
|-------------|-------------|-------------|-------------|-------------|-----------|-----------|-----------|
| Ce14Ni6Si11 | 0.000       | 0.783       | 2.406       | 2.450       | 1.960     | 1.713     | 1.382     |
| Ce15Ni4Si13 | 0.783       | 0.000       | 2.416       | 2.459       | 1.979     | 1.773     | 1.428     |
| Ce2Ni15Si2# | 2.406       | 2.416       | 0.000       | 1.457       | 2.213     | 2.203     | 2.309     |
| Ce2Ni17Si5# | 2.450       | 2.459       | 1.457       | 0.000       | 2.330     | 2.352     | 2.452     |
| Ce2Ni3Si5   | 1.960       | 1.979       | 2.213       | 2.330       | 0.000     | 1.082     | 1.324     |
| Ce2Ni7      | 1.937       | 1.959       | 2.102       | 2.189       | 2.015     | 2.028     | 2.076     |
| Ce2Si7      | 1.931       | 1.991       | 2.297       | 2.463       | 2.040     | 1.976     | 1.928     |
| Ce3Ni2Si8   | 1.713       | 1.773       | 2.203       | 2.352       | 1.082     | 0.000     | 0.941     |
| Ce3Ni4Si4   | 1.382       | 1.428       | 2.309       | 2.452       | 1.324     | 0.941     | 0.000     |
| Ce3Ni6Si2   | 2.039       | 2.013       | 2.267       | 2.397       | 2.306     | 2.321     | 2.286     |
| Ce3NiSi3#   | 0.344       | 0.657       | 2.381       | 2.372       | 1.869     | 1.660     | 1.382     |
| Ce3Si2      | 1.266       | 1.207       | 2.176       | 2.233       | 2.196     | 2.099     | 1.978     |
| Ce5Ni2Si3   | 0.665       | 0.695       | 2.368       | 2.393       | 2.017     | 1.811     | 1.523     |
| Ce5Si3      | 1.327       | 1.347       | 2.367       | 2.411       | 2.343     | 2.201     | 2.140     |
| Ce5Si4      | 1.080       | 1.128       | 2.299       | 2.362       | 2.134     | 2.067     | 1.999     |
| Ce6Ni2Si3#  | 1.006       | 0.683       | 2.414       | 2.459       | 2.088     | 1.813     | 1.847     |
| Ce6Ni7Si4   | 1.204       | 1.418       | 2.383       | 2.460       | 1.988     | 1.794     | 1.626     |
| Ce7Ni2Si5   | 0.538       | 0.825       | 2.401       | 2.457       | 2.077     | 1.896     | 1.907     |
| Ce7Ni3      | 1.351       | 1.130       | 2.224       | 2.239       | 2.191     | 2.054     | 2.084     |
| CeNi        | 0.995       | 1.098       | 2.468       | 2.560       | 2.288     | 2.100     | 2.109     |
| CeNi2       | 1.809       | 1.733       | 2.354       | 2.283       | 2.304     | 2.257     | 2.258     |
| CeNi2Si2    | 2.087       | 2.073       | 2.141       | 2.290       | 1.122     | 1.011     | 1.299     |
| CeNi3       | 1.930       | 1.958       | 2.185       | 2.345       | 2.011     | 2.043     | 2.048     |
| CeNi4Si     | 2.431       | 2.206       | 1.626       | 1.992       | 1.819     | 1.989     | 2.145     |
| CeNi5       | 2.320       | 2.154       | 1.643       | 1.998       | 1.684     | 1.839     | 2.047     |
| CeNi6Si6    | 2.422       | 2.492       | 1.875       | 1.419       | 1.967     | 2.170     | 2.418     |
| CeNi8Si5#   | 2.535       | 2.575       | 1.801       | 1.317       | 2.382     | 2.457     | 2.641     |
| CeNi9Si4    | 2.473       | 2.538       | 1.788       | 1.467       | 2.450     | 2.516     | 2.607     |
| CeNiSi#     | 0.683       | 0.520       | 2.384       | 2.362       | 1.665     | 1.416     | 0.682     |
| CeNiSi      | 0.791       | 1.007       | 2.445       | 2.524       | 1.628     | 0.949     | 0.698     |
| CeNiSi2     | 1.722       | 1.758       | 2.313       | 2.512       | 1.162     | 0.500     | 0.804     |
| CeSi        | 0.720       | 0.804       | 2.277       | 2.400       | 2.012     | 1.953     | 1.997     |
| CeSi2       | 0.835       | 1.074       | 2.275       | 2.430       | 1.572     | 1.134     | 0.790     |
| CeSi5       | 2.066       | 1.940       | 1.992       | 2.071       | 2.089     | 2.050     | 1.994     |
| Ni2Si       | 2.590       | 2.639       | 2.274       | 2.274       | 2.782     | 2.777     | 2.722     |
| Ni3Si       | 2.738       | 2.796       | 1.918       | 1.690       | 2.999     | 3.011     | 2.936     |
| NiSi        | 2.491       | 2.520       | 2.488       | 2.446       | 2.624     | 2.608     | 2.575     |
| NiSi2       | 2.571       | 2.589       | 2.437       | 2.390       | 2.560     | 2.703     | 2.749     |

|             | Ce3Ni6Si2 | Ce3NiSi3# | Ce5Ni2Si3 | Ce6Ni2Si3# | Ce6Ni7Si4 | Ce7Ni2Si5 | CeNi2Si2 |
|-------------|-----------|-----------|-----------|------------|-----------|-----------|----------|
| Ce14Ni6Si11 | 2.039     | 0.344     | 0.665     | 1.006      | 1.204     | 0.538     | 2.087    |
| Ce15Ni4Si13 | 2.013     | 0.657     | 0.695     | 0.683      | 1.418     | 0.825     | 2.073    |
| Ce2Ni15Si2# | 2.267     | 2.381     | 2.368     | 2.414      | 2.383     | 2.401     | 2.141    |
| Ce2Ni17Si5# | 2.397     | 2.372     | 2.393     | 2.459      | 2.460     | 2.457     | 2.290    |
| Ce2Ni3Si5   | 2.306     | 1.869     | 2.017     | 2.088      | 1.988     | 2.077     | 1.122    |
| Ce2Ni7      | 1.515     | 1.951     | 1.857     | 1.893      | 1.915     | 1.845     | 1.893    |
| Ce2Si7      | 1.914     | 1.854     | 1.963     | 2.093      | 1.825     | 1.999     | 1.970    |
| Ce3Ni2Si8   | 2.321     | 1.660     | 1.811     | 1.813      | 1.794     | 1.896     | 1.011    |
| Ce3Ni4Si4   | 2.286     | 1.382     | 1.523     | 1.847      | 1.626     | 1.907     | 1.299    |
| Ce3Ni6Si2   | 0.000     | 2.113     | 2.051     | 2.053      | 1.902     | 2.098     | 2.445    |
| Ce3NiSi3#   | 2.113     | 0.000     | 0.465     | 1.203      | 1.272     | 0.905     | 2.000    |
| Ce3Si2      | 1.996     | 1.619     | 1.195     | 1.161      | 1.473     | 1.261     | 2.238    |
| Ce5Ni2Si3   | 2.051     | 0.465     | 0.000     | 0.428      | 1.341     | 0.778     | 2.138    |
| Ce5Si3      | 2.241     | 1.717     | 1.211     | 1.266      | 1.658     | 1.322     | 2.413    |
| Ce5Si4      | 2.141     | 1.396     | 1.062     | 1.041      | 1.374     | 1.059     | 2.292    |
| Ce6Ni2Si3#  | 2.053     | 1.203     | 0.428     | 0.000      | 1.461     | 0.885     | 2.353    |
| Ce6Ni7Si4   | 1.902     | 1.272     | 1.341     | 1.461      | 0.000     | 1.218     | 1.981    |
| Ce7Ni2Si5   | 2.098     | 0.905     | 0.778     | 0.885      | 1.218     | 0.000     | 2.221    |
| Ce7Ni3      | 2.019     | 1.550     | 1.231     | 1.239      | 1.452     | 1.354     | 2.206    |
| CeNi        | 2.185     | 1.299     | 1.056     | 1.131      | 1.160     | 0.977     | 2.224    |
| CeNi2       | 1.747     | 1.898     | 1.699     | 1.694      | 1.799     | 1.788     | 2.393    |
| CeNi2Si2    | 2.445     | 2.000     | 2.138     | 2.353      | 1.981     | 2.221     | 0.000    |
| CeNi3       | 1.600     | 1.915     | 1.853     | 1.895      | 1.930     | 1.857     | 1.916    |
| CeNi4Si     | 1.760     | 2.317     | 2.256     | 2.395      | 2.367     | 2.495     | 1.824    |
| CeNi5       | 1.786     | 2.316     | 2.214     | 2.396      | 2.383     | 2.514     | 1.746    |
| CeNi6Si6    | 2.620     | 2.428     | 2.447     | 2.462      | 2.377     | 2.403     | 2.256    |
| CeNi8Si5#   | 2.585     | 2.497     | 2.516     | 2.565      | 2.533     | 2.508     | 2.472    |
| CeNi9Si4    | 2.563     | 2.450     | 2.467     | 2.520      | 2.454     | 2.450     | 2.441    |
| CeNiSi#     | 2.132     | 0.665     | 0.826     | 1.836      | 1.461     | 1.734     | 1.754    |
| CeNiSi      | 2.304     | 0.997     | 1.074     | 1.466      | 1.188     | 1.380     | 2.025    |
| CeNiSi2     | 2.319     | 1.666     | 1.813     | 1.818      | 1.747     | 1.896     | 1.382    |
| CeSi        | 2.116     | 0.810     | 0.824     | 1.023      | 1.215     | 0.763     | 2.154    |
| CeSi2       | 2.225     | 1.053     | 1.166     | 1.616      | 1.176     | 1.490     | 1.906    |
| CeSi5       | 1.966     | 2.034     | 1.944     | 2.134      | 2.042     | 2.229     | 2.055    |
| Ni2Si       | 2.636     | 2.598     | 2.552     | 2.586      | 2.640     | 2.550     | 2.793    |
| Ni3Si       | 2.824     | 2.708     | 2.666     | 2.727      | 2.848     | 2.693     | 2.964    |
| NiSi        | 2.783     | 2.498     | 2.491     | 2.499      | 2.539     | 2.480     | 2.667    |
| NiSi2       | 2.667     | 2.578     | 2.494     | 2.482      | 2.667     | 2.522     | 2.751    |



|             | CeNi4Si | CeNi6Si6 | CeNi8Si5# | CeNi9Si4 | CeNiSi# | CeNiSi | CeNiSi2 |
|-------------|---------|----------|-----------|----------|---------|--------|---------|
| Ce14Ni6Si11 | 2.431   | 2.422    | 2.535     | 2.473    | 0.683   | 0.791  | 1.722   |
| Ce15Ni4Si13 | 2.206   | 2.492    | 2.575     | 2.538    | 0.520   | 1.007  | 1.758   |
| Ce2Ni15Si2# | 1.626   | 1.875    | 1.801     | 1.788    | 2.384   | 2.445  | 2.313   |
| Ce2Ni17Si5# | 1.992   | 1.419    | 1.317     | 1.467    | 2.362   | 2.524  | 2.512   |
| Ce2Ni3Si5   | 1.819   | 1.967    | 2.382     | 2.450    | 1.665   | 1.628  | 1.162   |
| Ce2Ni7      | 0.981   | 2.396    | 2.475     | 2.582    | 2.023   | 2.286  | 2.079   |
| Ce2Si7      | 2.144   | 2.472    | 2.648     | 2.644    | 1.792   | 1.860  | 1.996   |
| Ce3Ni2Si8   | 1.989   | 2.170    | 2.457     | 2.516    | 1.416   | 0.949  | 0.500   |
| Ce3Ni4Si4   | 2.145   | 2.418    | 2.641     | 2.607    | 0.682   | 0.698  | 0.804   |
| Ce3Ni6Si2   | 1.760   | 2.620    | 2.585     | 2.563    | 2.132   | 2.304  | 2.319   |
| Ce3NiSi3#   | 2.317   | 2.428    | 2.497     | 2.450    | 0.665   | 0.997  | 1.666   |
| Ce3Si2      | 2.220   | 2.431    | 2.371     | 2.346    | 1.953   | 2.065  | 2.097   |
| Ce5Ni2Si3   | 2.256   | 2.447    | 2.516     | 2.467    | 0.826   | 1.074  | 1.813   |
| Ce5Si3      | 2.383   | 2.569    | 2.421     | 2.401    | 2.076   | 2.154  | 2.219   |
| Ce5Si4      | 2.364   | 2.341    | 2.391     | 2.338    | 2.030   | 1.927  | 2.066   |
| Ce6Ni2Si3#  | 2.395   | 2.462    | 2.565     | 2.520    | 1.836   | 1.466  | 1.818   |
| Ce6Ni7Si4   | 2.367   | 2.377    | 2.533     | 2.454    | 1.461   | 1.188  | 1.747   |
| Ce7Ni2Si5   | 2.495   | 2.403    | 2.508     | 2.450    | 1.734   | 1.380  | 1.896   |
| Ce7Ni3      | 2.275   | 2.306    | 2.269     | 2.243    | 2.116   | 2.090  | 2.058   |
| CeNi        | 2.543   | 2.524    | 2.608     | 2.535    | 2.249   | 1.954  | 2.098   |
| CeNi2       | 1.968   | 2.599    | 2.481     | 2.505    | 2.336   | 2.183  | 2.252   |
| CeNi2Si2    | 1.824   | 2.256    | 2.472     | 2.441    | 1.754   | 2.025  | 1.382   |
| CeNi3       | 1.397   | 2.443    | 2.574     | 2.570    | 1.946   | 2.260  | 2.039   |
| CeNi4Si     | 0.000   | 2.193    | 2.212     | 2.404    | 2.041   | 2.378  | 2.158   |
| CeNi5       | 0.504   | 2.244    | 2.300     | 2.325    | 2.019   | 2.348  | 2.020   |
| CeNi6Si6    | 2.193   | 0.000    | 1.147     | 1.139    | 2.473   | 2.469  | 2.417   |
| CeNi8Si5#   | 2.212   | 1.147    | 0.000     | 0.478    | 2.546   | 2.709  | 2.710   |
| CeNi9Si4    | 2.404   | 1.139    | 0.478     | 0.000    | 2.503   | 2.651  | 2.660   |
| CeNiSi#     | 2.041   | 2.473    | 2.546     | 2.503    | 0.000   | 0.978  | 1.423   |
| CeNiSi      | 2.378   | 2.469    | 2.709     | 2.651    | 0.978   | 0.000  | 0.986   |
| CeNiSi2     | 2.158   | 2.417    | 2.710     | 2.660    | 1.423   | 0.986  | 0.000   |
| CeSi        | 2.394   | 2.363    | 2.413     | 2.324    | 2.088   | 1.941  | 1.950   |
| CeSi2       | 2.232   | 2.412    | 2.603     | 2.556    | 1.014   | 0.560  | 1.180   |
| CeSi5       | 1.833   | 2.414    | 2.292     | 2.281    | 1.873   | 2.247  | 2.165   |
| Ni2Si       | 2.569   | 2.304    | 1.797     | 1.630    | 2.626   | 2.652  | 2.781   |
| Ni3Si       | 2.681   | 2.617    | 0.705     | 0.695    | 2.696   | 2.898  | 3.065   |
| NiSi        | 2.755   | 2.361    | 2.520     | 2.439    | 2.514   | 2.495  | 2.590   |
| NiSi2       | 2.660   | 2.343    | 2.248     | 2.261    | 2.622   | 2.688  | 2.746   |

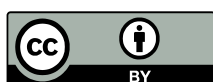

Supplement: s1 [file s1]
